# Supplementary material
Source: PubMed Central journal article supplement (PMC9983761)
Supplement: NIHMS1866361-supplement-33904762_WilliamLinehan__SuppleTable1.pdf [file NIHMS1866361-supplement-33904762_WilliamLinehan__SuppleTable1.pdf]

**Supplementary Table 1a. Alternative Multivariate Analysis of Risk Factors for Grade  $\geq 3$  Complication**

| <b>Risk Factor</b>                            | <b>Logistic Coefficient</b> | <b>Odds Ratio</b> | <b>C.I. 95%</b> | <b>P Value</b> |
|-----------------------------------------------|-----------------------------|-------------------|-----------------|----------------|
| <b>Surgery Duration</b>                       | 0.003                       | 1.003             | 0.998 – 1.008   | 0.2            |
| <b>Cohort</b>                                 |                             |                   |                 |                |
| Open after MIS only                           | -0.1                        | 0.9               | 0.2 – 5.1       | 0.9            |
| Open after open                               | <i>Ref</i>                  | <i>Ref</i>        | <i>Ref</i>      | <i>Ref</i>     |
| Robotic after MIS only                        | -0.9                        | 0.4               | 0.1 – 1.5       | 0.2            |
| Robotic after open                            | -1.4                        | 0.2               | 0.07 – 0.9      | 0.03           |
| <b>Number of Prior Ipsilateral Procedures</b> | -0.06                       | 0.9               | 0.6 – 1.5       | 0.8            |
| <b>Number of Tumors Resected</b>              | -0.02                       | 1.0               | 0.9 – 1.04      | 0.5            |
| <b>Estimated Blood Loss (per 100 ml)</b>      | 0.0003                      | 1.03              | 1.009 – 1.05    | 0.005          |
| <b>Constant</b>                               | -3.0                        | 0.05              |                 |                |
