# Supplementary material
Source: PubMed Central journal article supplement (PMC9983761)
Supplement: NIHMS1866361-supplement-33904762_WilliamLinehan__SuppleTable2.pdf [file NIHMS1866361-supplement-33904762_WilliamLinehan__SuppleTable2.pdf]

| <b>Supplementary Table 1b. Subgroup Multivariate Analysis of Risk Factors for Grade ≥3 Complications</b> |                             |                   |                 |                |
|----------------------------------------------------------------------------------------------------------|-----------------------------|-------------------|-----------------|----------------|
| <b>Risk Factor</b>                                                                                       | <b>Logistic Coefficient</b> | <b>Odds Ratio</b> | <b>C.I. 95%</b> | <b>P Value</b> |
| <b>Surgery Duration</b>                                                                                  | 0.0007                      | 1.0007            | 0.995 – 1.006   | 0.8            |
| <b>Prior Surgical History</b>                                                                            |                             |                   |                 |                |
| History of MIS surgery only                                                                              | <i>Ref</i>                  | <i>Ref</i>        | <i>Ref</i>      | <i>Ref</i>     |
| History of open surgery only                                                                             | 0.3                         | 1.3               | 0.4 – 4.1       | 0.6            |
| <b>Number of Prior Ipsilateral Procedures</b>                                                            | 0.4                         | 1.5               | 0.8 – 2.7       | 0.2            |
| <b>Number of Tumors Resected</b>                                                                         | 0.02                        | 1.02              | 0.97 – 1.08     | 0.5            |
| <b>Estimated Blood Loss per 100 mL</b>                                                                   | 0.03                        | 1.03              | 1.008 – 1.06    | 0.007          |
| <b>Constant</b>                                                                                          | -3.5                        | 0.03              |                 |                |

Supplementary Table 1. (A) Adjustment to the multivariate model in which the history of an open procedure and the current procedure utilized were replaced by the original four cohorts. (B) Same multivariate model but applied to only to a subgroup of patients who had a history of only open surgery and those who had a history of only prior MIS surgery. MIS: Minimally invasive surgery, C.I.: Confidence interval
